# Supplementary material for: Learning from stakeholders to inform good practice guidance on consent to research in intensive care units: a mixed-methods study
Source: HighWire-hosted journal article supplement (doi:10.1136/bmjopen-2022-066149), 2022-11-01
Supplement: bmjopen-2022-066149supp002_data_supplement.pdf [file bmjopen-2022-066149supp002_data_supplement.pdf]

## Supplementary File 2

Table 2: Interview sample

|                                     | Category       | Patients<br>N=13<br>n(%) | Relatives<br>N=30<br>n(%) | HCPs<br>N=17<br>n(%) |
|-------------------------------------|----------------|--------------------------|---------------------------|----------------------|
| Gender                              | Male           | 5 (39)                   | 11 (37)                   | 6 (35)               |
|                                     | Female         | 8 (62)                   | 19 (63)                   | 11 (66)              |
| Age                                 | 18 to24        | 1 (8)                    | 2 (7)                     | 1 (6)                |
|                                     | 25 to 34       | 2 (15)                   | 4 (13)                    | 8 (47)               |
|                                     | 35 to 44       | 1 (8)                    | 6 (20)                    | 4 (24)               |
|                                     | 45 to 54       | 2 (15)                   | 5 (17)                    | 3 (18)               |
|                                     | 55 to 64       | 2 (15)                   | 5 (17)                    | 0 (0)                |
|                                     | 65 to 74       | 4 (31)                   | 3 (10)                    | 0 (0)                |
|                                     | 75+            | 1 (8)                    | 1 (3)                     | 0 (0)                |
|                                     | Unknown        | 0 (0)                    | 4 (13)                    | 1 (6)                |
| Relationship to patient             | Son/Daughter   | N/A                      | 12 (30)                   | N/A                  |
|                                     | Brother/Sister | N/A                      | 1 (3)                     | N/A                  |
|                                     | Mother/Father  | N/A                      | 3 (10)                    | N/A                  |
|                                     | Spouse/Partner | N/A                      | 13 (43)                   | N/A                  |
|                                     | Friend         | N/A                      | 0 (0)                     | N/A                  |
|                                     | Other          | N/A                      | 1 (3)                     | N/A                  |
| Socio-economic status*              | High           | 3 (23)                   | 10 (33)                   | N/A                  |
|                                     | Medium         | 3 (23)                   | 7 (23)                    | N/A                  |
|                                     | Low            | 4 (31)                   | 11 (37)                   | N/A                  |
|                                     | Unknown        | 3 (23)                   | 2 (7)                     | N/A                  |
| Previous experience with research** | Yes            | 6 (46)                   | 19 (63)                   | 13 (76)              |
|                                     | No             | 7 (54)                   | 11 (37)                   | 4 (24)               |
| Consented to research*              | Yes            | 6 (46)                   | 15 (30)                   | N/A                  |
|                                     | No             | 0 (0)                    | 4 (13)                    | N/A                  |
|                                     | Not applicable | 7 (54)                   | 11 (37)                   | N/A                  |

\*only applicable to patients and relatives

\*\* approached about research (patients and relatives), involved in the consent and recruitment to research (HCPs)
